# Supplementary material for: Risk of advanced fibrosis in first-degree relatives of patients with nonalcoholic fatty liver disease
Source: JCI journal article supplement (doi:10.1172/jci162513), 2022-10-31
Supplement: sd1 [file 1]

**Supplemental table 1. Characteristics of probands in the derivation and validation cohort**

|                                      | UCSD (derivation) cohort       |                                                      |                                                   | Helsinki (validation) cohort   |                                                      |                                                   |
|--------------------------------------|--------------------------------|------------------------------------------------------|---------------------------------------------------|--------------------------------|------------------------------------------------------|---------------------------------------------------|
|                                      | Probands of non-NAFLD (n = 73) | Probands of NAFLD without advanced fibrosis (n = 17) | Probands of NAFLD with advanced fibrosis (n = 66) | Probands of non-NAFLD (n = 46) | Probands of NAFLD without advanced fibrosis (n = 19) | Probands of NAFLD with advanced fibrosis (n = 21) |
| Age (years)                          | 54 (27–62)                     | 57 (48–62)                                           | 63 (57–70)                                        | 55 (42–61)                     | 56 (51–62)                                           | 65 (61–67)                                        |
| Gender (female, n, %)                | 57 (78.1%)                     | 9 (52.9%)                                            | 49 (74.2%)                                        | 35 (76.1%)                     | 13 (68.4%)                                           | 9 (42.9%)                                         |
| Race/ethnicity                       |                                |                                                      |                                                   |                                |                                                      |                                                   |
| Hispanic (n, %)                      | 13 (17.8%)                     | 4 (23.5%)                                            | 42 (63.6%)                                        | 0 (0%)                         | 0 (0%)                                               | 0 (0%)                                            |
| Non-Hispanic (n, %)                  | 60 (82.2%)                     | 13 (76.5%)                                           | 24 (36.4%)                                        | 46 (100%)                      | 19 (100%)                                            | 21 (100%)                                         |
| Waist circumference (cm)             | 87 (80–96)                     | 102 (95–114)                                         | 107 (97–115)                                      | 88 (79–98)                     | 106 (93–113)                                         | 106 (100–117)                                     |
| BMI (kg/m <sup>2</sup> )             | 24.6 (22–28)                   | 30.4 (29–37)                                         | 30.8 (37–36)                                      | 25.8 (23–29)                   | 32.6 (28–34)                                         | 31.4 (29–36)                                      |
| DM (n, %)                            | 3 (4.1%)                       | 8 (47.1%)                                            | 47 (71.2%)                                        | 5 (10.9%)                      | 4 (21.1%)                                            | 18 (85.7%)                                        |
| Dyslipidemia (n, %)                  | 27 (37.0%)                     | 13 (76.5%)                                           | 45 (68.2%)                                        | 19 (41.3%)                     | 14 (73.7%)                                           | 17 (81.0%)                                        |
| Hypertension (n, %)                  | 26 (35.6%)                     | 15 (88.2%)                                           | 54 (81.8%)                                        | 31 (67.4%)                     | 16 (84.2%)                                           | 21 (100%)                                         |
| AST (IU/L)                           | 21 (18–26)                     | 21 (17–24)                                           | 42 (34–54)                                        | 20 (16–25)                     | 30 (20–54)                                           | 41 (26–54)                                        |
| ALT (IU/L)                           | 17 (13–25)                     | 22 (17–31)                                           | 35 (26–48)                                        | 21 (17–29)                     | 47 (28–92)                                           | 39 (25–55)                                        |
| GGT (IU/L)                           | 17 (12–23)                     | 26 (17–35)                                           | 72 (45–133)                                       | 18 (14–24)                     | 26 (20–64)                                           | 58 (30–125)                                       |
| Glucose (mg/dl)                      | 89 (83–93)                     | 101 (90–113)                                         | 111 (95–147)                                      | 94 (89–101)                    | 104 (99–113)                                         | 149 (119–172)                                     |
| HbA1c (%)                            | 5.6 (5.5–5.9)                  | 6.1 (5.5–7.2)                                        | 6.3 (5.6–7.2)                                     | 5.3 (5.1–5.4)                  | 5.6 (5.4–6.0)                                        | 7.2 (6.4–7.6)                                     |
| HDL (mg/dl)                          | 64 (52–76)                     | 48 (39–51)                                           | 44 (36–54)                                        | 60 (50–69)                     | 44 (38–57)                                           | 37 (34–48)                                        |
| TG (mg/dl)                           | 72 (60–100)                    | 120 (88–193)                                         | 111 (91–148)                                      | 77 (55–91)                     | 139 (83–158)                                         | 143 (107–215)                                     |
| Platelet counts (10 <sup>9</sup> /L) | 242 (213–292)                  | 275 (246–325)                                        | 150 (96–202)                                      | 253 (203–281)                  | 287 (242–304)                                        | 178 (145–206)                                     |

Continuous data are shown in median (interquartile range).

NAFLD, nonalcoholic fatty liver disease; BMI, body mass index; DM, diabetes mellitus; AST, aspartate aminotransferase; ALT, alanine aminotransferase; GGT, gamma glutamyl transferase; HbA1c, hemoglobin A1c, HDL, high-density lipoprotein; TG, triglyceride; UCSD, University of California San Diego
